# Supplementary material for: A systematic review of tourniquet use in paediatric orthopaedic surgery: can we extrapolate from adult guidelines?
Source: PubMed Central journal article supplement — EFORT Open Rev. 2024 Jan 9;9(1):80–91. doi: 10.1530/EOR-23-0091 (PMC10823570; doi:10.1530/eor-23-0091), 2024-01-09
Supplement: EOR-23-0091supplementary_material.pdf [file EOR-23-0091supplementary_material.pdf]

# Appendices:

Appendix 1:

## Search Terms

1. paediatric OR pediatric OR paediatrics OR pediatrics OR paediatr\* OR pediatric\* OR child\*
2. orthopaedic OR orthopedic OR orthopaed\* OR orthoped\*
3. surgery OR surgeries OR surger\* OR procedure OR procedures OR procedur\*
4. tourniquet OR tourniquets OR tourniq\*
5. 1 AND 2 AND 3 AND 4

## Appendix 2:

### Bias Assessment

| Study ID                | Risk of Bias | Comments                                                                                                                                                                                                                      |
|-------------------------|--------------|-------------------------------------------------------------------------------------------------------------------------------------------------------------------------------------------------------------------------------|
| Lynn et al(45)          | Low          |                                                                                                                                                                                                                               |
| Goodarzi et al 1992(47) | Low          |                                                                                                                                                                                                                               |
| Reilly et al(65)        | Low          |                                                                                                                                                                                                                               |
| Prakash et al(73)       | Low          |                                                                                                                                                                                                                               |
| Hanna et al(62)         | Low          |                                                                                                                                                                                                                               |
| Ashraf et al(68)        | Low          |                                                                                                                                                                                                                               |
| Baghdadi et al(78)      | Low          |                                                                                                                                                                                                                               |
| Tareco et al(76)        | Low          |                                                                                                                                                                                                                               |
| Hanlon et al(56)        | Low          |                                                                                                                                                                                                                               |
| Lieberman et al(64)     | Moderate     | Insufficient detail on intervention (Detail of surgeries performed is not provided).                                                                                                                                          |
| Vas et al(63)           | Moderate     | Unclear intra-operative monitoring protocol. No statistical analysis reported.                                                                                                                                                |
| Inan et al(53)          | Moderate     | Small sample size. One surgeon (? Influence of surgical technique). Unclear if there is a difference in malnutrition between the groups and how this is monitored.                                                            |
| Cai et al(81)           | Moderate     | Unclear patient selection and allocation to intervention group (how patients were allocated to hybrid vs dual plating).                                                                                                       |
| Ross et al(41)          | Moderate     | Insufficient detail on protocol used for measurement of outcomes.                                                                                                                                                             |
| Goodarzi et al 1997(46) | Moderate     | Insufficient detail on intervention.                                                                                                                                                                                          |
| Reinhardt et al(79)     | Moderate     | Unclear how patients were allocated to nails vs ORIF (retrospective) and follow-up times are not reported and not standardised ("until union", "at the latest appointment a functional assessment was performed to judge ROM) |
| Yalcinkaya et al(54)    | Moderate     | Unclear selection criteria, two centres, unclear if same surgeons or not and how many children from each centre. Follow-up not clearly reported.                                                                              |
| Watts et al(80)         | Moderate     | Small sample size, multiple surgeons, no standardised protocol, unclear follow up time.                                                                                                                                       |
| Sullivan et al(40)      | Moderate     | Small sample size (although rare disease). Short follow-up time (6 weeks - some patients could have presented to their local / other hospital and take longer than 6 weeks to be referred to main unit).                      |
| Ryan et al(82)          | Moderate     | Unclear how many surgeons of different seniority were involved (one of main conclusions is that the more junior the surgeon the higher the risk of complications).                                                            |
| Tredwell et al(55)      | Moderate     | Unclear patient selection, small sample size for component of the study investigating wrinkling (n=2), insufficient detail on how complications are reported in the survey.                                                   |
| Silver et al(57)        | Moderate     | Unclear inclusion criteria, small patient sample, intervention not                                                                                                                                                            |

|                      |      |                                                                                                                                                                                                                                                                                                                                           |
|----------------------|------|-------------------------------------------------------------------------------------------------------------------------------------------------------------------------------------------------------------------------------------------------------------------------------------------------------------------------------------------|
|                      |      | uniform, no controls.                                                                                                                                                                                                                                                                                                                     |
| Bloch et al 1992(44) | High | Unclear patient selection, controls did not undergo orthopaedic operations, incomplete information on intervention (operations performed and tourniquet details not specified).                                                                                                                                                           |
| Bloch et al 1986(43) | High | Controls used did not undergo orthopaedic operations, anaesthetic protocol not uniform.                                                                                                                                                                                                                                                   |
| Schrock et al(49)    | High | Unclear patient selection, no statistical analysis of correlations, unclear follow-up.                                                                                                                                                                                                                                                    |
| Slawski et al(50)    | High | Unclear population selection, unclear intervention protocol, no statistical analysis (as too many subgroups and small numbers).                                                                                                                                                                                                           |
| Ida et al(61)        | High | One case. Causality of tourniquet not clearly established.                                                                                                                                                                                                                                                                                |
| Kang et al(67)       | High | Unclear patient selection criteria, insufficient detail on measured outcomes.                                                                                                                                                                                                                                                             |
| Murphy et al(60)     | High | Only symptomatic patients had USS. Only the characteristics of patients with DVT were analysed.                                                                                                                                                                                                                                           |
| Eidelman et al(66)   | High | Unclear selection, analysis of risk factors performed only on small number of patients with VTE.                                                                                                                                                                                                                                          |
| Saw et al(51)        | High | Case report. Difficult to establish causality.                                                                                                                                                                                                                                                                                            |
| Tamai et al(69)      | High | No standardised protocol for administration, no description of post op care and follow-up (e.g. casting could result in neuro symptoms), follow-up not uniform.                                                                                                                                                                           |
| Jardaly et al(52)    | High | No clear selection criteria for allocation to CRIF vs ORIF. No clear description how many if any went from CRIF to ORIF as could not be reduced. Patient selection (42.1% patients obese). Claim that there were no ligamentous or meniscal injuries but no description of how this was determined (states that no pre-op MRI were done). |
| Misra et al(48)      | High | Unclear patient selection criteria, small sample size (n=2), insufficient detail on intervention and measured outcomes.                                                                                                                                                                                                                   |
| Hodgins et al(58)    | High | Small patient sample (n=2), intervention protocol not standardised (shut off not used in one case).                                                                                                                                                                                                                                       |
| Dickinson et al(77)  | High | Small patient sample (n=3), insufficient detail on intervention and protocol used.                                                                                                                                                                                                                                                        |
| Oginni et al(42)     | High | Unclear protocol for measurement of outcomes, unclear length of follow-up.                                                                                                                                                                                                                                                                |
| Zampieri et al(70)   | High | Retrospective, non-randomised. Significant number of patients in Group B underwent additional procedure. Degree of patella instability was not quantified pre-op.                                                                                                                                                                         |
| Lindgren et al(71)   | High | Unclear selection criteria. Small sample size. Surgeon's equipoise in choice of treatment. No detail about satisfactory fracture healing /evidence of malunion/ non-union prior to refracture.                                                                                                                                            |
